# Supplementary material
Source: publisher figshare collection journal article supplement (https://tandf.figshare.com/articles/dataset/_/1265147)
Supplement: Supplementary file 1 [file 2]

Supplementary data – Journal of Vertebrate Paleontology

Endocranial and inner ear morphology of *Vintana sertichi* (Mammalia, Gondwanatheria)  
from the Late Cretaceous of Madagascar

SIMONE HOFFMANN,<sup>1</sup> PATRICK M. O’CONNOR,<sup>2, 3</sup> E. CHRISTOPHER KIRK,<sup>4, 5</sup>  
JOHN R. WIBLE,<sup>6</sup> and DAVID W. KRAUSE<sup>1</sup>

<sup>1</sup>Department of Anatomical Sciences, Stony Brook University, Stony Brook, New York  
11794-8081, U.S.A., [simone.hoffmann@stonybrook.edu](mailto:simone.hoffmann@stonybrook.edu),

[David.Krause@stonybrook.edu](mailto:David.Krause@stonybrook.edu);

<sup>2</sup>Department of Biomedical Sciences, 228 Irvine Hall, Ohio University, Athens, Ohio  
45701, U.S.A., [oconnorp@ohio.edu](mailto:oconnorp@ohio.edu);

<sup>3</sup>Ohio Center for Ecology and Evolutionary Studies, Irvine Hall, Athens, Ohio 45701,  
U.S.A.;

<sup>4</sup>Department of Anthropology, University of Texas at Austin, Austin, Texas 78712,  
U.S.A., [eckirk@mail.utexas.edu](mailto:eckirk@mail.utexas.edu);

<sup>5</sup>Vertebrate Paleontology Laboratory, Jackson School of Geosciences, University of  
Texas at Austin, Texas 78712, U.S.A.;

<sup>6</sup>Section of Mammals, Carnegie Museum of Natural History, 5800 Baum Boulevard,  
Pittsburgh, Pennsylvania 15206, U.S.A., [wiblej@CarnegieMNH.org](mailto:wiblej@ CarnegieMNH.org)

TABLE S1. Endocranial volume and body masses in 517 extinct (†) and extant cynodonts. Encephalization quotient (**EQ**) calculated from endocranial volume (**EV**) including olfactory bulbs, and body mass (**BM**) using Eisenberg's (1981) equation =  $EV/(0.055[BM]^{0.74})$ . Endocranial volume is given in  $cm^3$  (= ml =  $1000\ mm^3$  = g). Body mass for *Vintana* is given as lower, mean, and upper estimates for the uncorrected and corrected endocranial volume. Wilson and Reader (2005) was used as the taxonomic authority. **References:** **1** = this study; **2** = Kirk et al. (this volume); **3** = Rodrigues et al. (2013); **4** = Macrini (2006); **5** = Rowe et al. (2011); **6** = Jerison (1973); **7** = Krause and Kielan-Jaworowska (1993); **8** = Haug (1987); **9** = Ashwell (2008); **10** = Eisenberg and Wilson (1981); **11** = Kielan-Jaworowska (1984); **12** = Eisenberg (1981); **13** = Stephan et al. (1981); **14** = Smith et al. (2003); **15** = Gittleman (1986a); **16** = Gittleman (1991); **17** = Finarelli and Flynn (2009); **18** = Finarelli (2008); **19** = Gittleman (1986b); **20** = Finarelli and Flynn (2007); **21** = Fuller et al. (1987); **22** = Larivière (1998); **23** = Nowak (1999); **24** = Bernard and Nurton (1993); **25** = Mann et al. (1988); **26** = Hafner and Hafner (1984); **27** = Iwaniuk (2001).

#

#

TABLE S2. Olfactory bulb volume, endocranial volume, and body masses of 163 extinct (†) and extant mammaliforms. Body mass for *Vintana* is given as lower, mean, and upper estimates for the uncorrected and corrected endocranial and olfactory bulb volume.

**References:** **1** = this study; **2** = Kirk et al. (this volume); **3** = Macrini (2006); **4** = Jerison (1973); **5** = Krause and Kielan-Jaworowska (1993); **6** = Stephan et al. (1981); **7** = Hutcheon et al. (2002). **Abbreviations:** **BM**, body mass in g; **EV**, endocranial volume in  $cm^3$  (= ml =  $1000\ mm^3$  = g); **OB**, combined olfactory bulb volume in  $cm^3$  (= ml =  $1000\ mm^3$  = g).

#

#

## LITERATURE CITED

- Ashwell, K. W. S. 2008. Encephalization of Australian and New Guinean marsupials. *Brain, Behavior and Evolution* 71:181–199.
- Bernard, R., and J. Nurton. 1993. Ecological correlates of relative brain size in some South African rodents. *African Zoology* 28:95–98.
- Eisenberg, J. F. 1981. *The Mammalian Radiations*. University of Chicago Press, Chicago, Illinois, 610 pp.
- Eisenberg, J. F., and D. E. Wilson. 1981. Relative brain size and demographic strategies in didelphid marsupials. *American Naturalist* 118:1–15.
- Finarelli, J. A. 2008. Testing hypotheses of the evolution of brain-body size scaling in the Canidae (Carnivora, Mammalia). *Paleobiology* 34:35–45.
- Finarelli, J. A., and J. J. Flynn. 2007. The evolution of encephalization in caniform carnivorans. *Evolution* 61:1758–1772.
- Finarelli, J. A., and J. J. Flynn. 2009. Brain-size evolution and sociality in Carnivora. *Proceedings of the National Academy of Sciences of the United States of America* 106:9345–9349.
- Fuller, T. K., W. E. Johnson, W. L. Franklin, and K. A. Johnson. 1987. Notes on the Patagonian hog-nosed skunk (*Conepatus humboldti*) in southern Chile. *Journal of*

- Mammalogy 68:864–867.
- Gittleman, J. L. 1986a. Carnivore brain size, behavioral ecology, and phylogeny. *Journal of Mammalogy* 67:23–36.
- Gittleman, J. L. 1986b. Carnivore life history patterns: allometric, phylogenetic, and ecological associations. *American Naturalist* 127:744–771.
- Gittleman, J. L. 1991. Carnivore olfactory bulb size: allometry, phylogeny and ecology. *Journal of Zoology* 225:253–272.
- Hafner, M. S., and J. C. Hafner. 1984. Brain size, adaptation and heterochrony in geomyoid rodents. *Evolution* 38:1088–1098.
- Haug, H. 1987. Brain sizes, surfaces, and neuronal sizes of the cortex cerebri: a stereological investigation of man and his variability and a comparison with some mammals (primates, whales, marsupials, insectivores, and one elephant). *American Journal of Anatomy* 180:126–142.
- Hutcheon, J. M., J. A. W. Kirsch, and T. Garland, Jr. 2002. A comparative analysis of brain size in relation to foraging ecology and phylogeny in the Chiroptera. *Brain, Behavior and Evolution* 60:165–180.
- Iwaniuk, A. N. 2001. Interspecific variation in sexual dimorphism in brain size in Nearctic ground squirrels (*Spermophilus* spp.). *Canadian Journal of Zoology* 79:759–765.
- Jerison, H. J. 1973. *Evolution of the Brain and Intelligence*. Academic Press, New York, New York, 482 pp.
- Kielan-Jaworowska, Z. 1984. Evolution of the therian mammals in the Late Cretaceous of Asia. VI. Endocranial casts of eutherian mammals. *Acta Palaeontologica Polonica* 46:157–171.
- Kirk, E. C., S. Hoffmann, A. D. Kemp, D. W. Krause, and P. M. O'Connor. 2014. Sensory anatomy and sensory ecology of *Vintana sertichi* (Mammalia, Gondwanatheria) from the Late Cretaceous of Madagascar; pp. XX–XX in D. W. Krause (ed.), *Vintana sertichi* (Mammalia, Gondwanatheria) from the Late Cretaceous of Madagascar. Society of Vertebrate Paleontology Memoir XX. *Journal of Vertebrate Paleontology* XX (X, Supplement).
- Krause, D. W., and Z. Kielan-Jaworowska. 1993. The endocranial cast and encephalization quotient of *Ptilodus* (Multituberculata, Mammalia). *Palaeovertebrata* 22:99–112.
- Lariviere, S. 1998. *Lontra felina*. *Mammalian Species* 575:1–5.
- Macrini, T. E. 2006. The evolution of endocranial space in mammals and non-mammalian cynodonts. Ph.D. dissertation, University of Texas at Austin, Austin, Texas, 295 pp.
- Mann, M. D., S. E. Glickman, and A. L. Towe. 1988. Brain/body relations among myomorph rodents. *Brain, Behavior and Evolution* 31:111–124.
- Nowak, R. M. 1999. *Walker's Mammals of the World*. Johns Hopkins University Press, Baltimore, Maryland, 2,015 pp.
- Rodrigues, P. G., I. Ruf, and C. L. Schultz. 2013. Study of a digital cranial endocast of the non-mammaliaform cynodont *Brasilitherium riograndensis* (Later Triassic, Brazil) and its relevance to the evolution of the mammalian brain. *Paläontologische Zeitschrift* DOI 10.1007/s12542-013-0200-6.
- Rowe, T. B., T. E. Macrini, and Z.-X. Luo. 2011. Fossil evidence on origin of the

#

- mammalian brain. *Science* 332:955–957.
- Smith, F.A., S. K. Lyons, S. K. M. Ernest, K. E. Jones, D. M. Kaufman, T. Dayan, P. A. Marquet, J. H. Brown, and J. P. Haskell. 2003. Body mass of Late Quaternary mammals: Ecological Archives E084-094. *Ecology* 84:3403.
- Stephan, H., H. D. Frahm, and G. Baron. 1981. New and revised data on volumes of brain structures in insectivores and primates. *Folia Primatologica* 35:1–29.
- Wilson, E., and D. M. Reeder. 2005. *Mammal Species of the World. A Taxonomic and Geographic Reference* (3<sup>rd</sup> edition). Johns Hopkins University Press, Baltimore, Maryland, 2,142 pp.

#
